# Supplementary material
Source: PubMed Central journal article supplement (PMC3389531)
Supplement: gmb-35-2-435-suppl1.pdf [file gmb-35-2-435-suppl1.pdf]

**Table S1** - Primer sequences used to analyse bovine TH and DBH genes.

| Gene                        | Primer sequence               | Amplicon size (bp) | Exon        |
|-----------------------------|-------------------------------|--------------------|-------------|
| DBH                         | F-5'-TGGCCGTCTTCCTGGTCATC-3'  | 321                | I           |
|                             | R-5'-GGGAGGGCGAGTGCAGAGAA-3'  |                    |             |
|                             | F-5'-GGGGCTGTGCTGTGGGTGAC-3'  | 297                | II          |
|                             | R-5'-GGTGAGGGGCCCCGGGATGCT-3' |                    |             |
|                             | F-5'-CCGGGCTTGGGGCTGTGAGT-3'  | 296                | III         |
|                             | R-5'-GATGTGGTGCCGGGGGAAGC-3'  |                    |             |
|                             | F-5'-GGTGCAGCCCTCCCATTTTA-3'  | 347                | IV          |
|                             | R-5'-CCAGCGGCGTAGAGGCAGTG-3'  |                    |             |
|                             | F-5'-CACCTGCCCATCTGTCTTCT-3'  | 197                | V           |
|                             | R-5'-GCAGGCGGGGGCAGGTAA-3'    |                    |             |
|                             | F-5'-GAGGGCGGCTGGGGGTCAT-3'   | 331                | VI          |
|                             | R-5'-GGGGGAGCGAGGTCACAGC-3'   |                    |             |
|                             | F-5'-CTGACTGGGGAGGAGGAAG-3'   | 560                | VII, VIII   |
|                             | R-5'-GGGCACTCACCGGCTGGAC-3'   |                    |             |
|                             | F-5'-TCTGGCCTCGTGTGATGA-3'    | 422                | X           |
|                             | R-5'-GTGGGTGGGGGCCTGAT-3'     |                    |             |
|                             | F-5'-GATGGCACAAGAGATGAAGC-3'  | 349                | XI          |
|                             | R-5'-GCACGGCGGCACACCTG-3'     |                    |             |
| F-5'-TTTGGTTTGGGAGAAGG-3'   | 702                           | XII                |             |
| R-5'-TGCACCCGTCACACTCAA-3'  |                               |                    |             |
| TH                          | F-5'CGGACCTCGCCGGCACCAT-3'    | 408                | I           |
|                             | R-5'GAGCACAGCCTCCCTTCAGC-3'   |                    |             |
|                             | F-5'CGGGGCAGCCCCAGACG-3'      | 421                | II          |
|                             | R-5'CGGGAGGGGCCCTCTCCT-3'     |                    |             |
|                             | F-5'AGGCCGCCTGGGGGTGACTG-3'   | 453                | III         |
|                             | R-5'GCCGAGGGCCGCCTCACCT-3'    |                    |             |
|                             | F-5CAGCGGCCCCCTCCCTGTGT-3'    | 489                | IV, V       |
|                             | R-5'GGCCCGAGGATGGGGTGTGG-3'   |                    |             |
|                             | F-5CCCCGAAGGGGCCTGGACT-3'     | 561                | VI, VII     |
|                             | R-5'GGCACCGCACCCCTTCAGGAA-3'  |                    |             |
|                             | F-5CGCCCCCGCCCCAGCAGA-3'      | 490                | VIII, IX, X |
|                             | R-5'GCCAAGGGTGCCATTGGTG-3'    |                    |             |
|                             | F-5CGGGCCCCCAGCGGATCC-3'      | 545                | XI, XII     |
|                             | R-5'TCCCGGGTGGCCTGAGTCCA-3'   |                    |             |
|                             | F-5AGTCGCCTCGGGTCCTGAGA-3'    | 463                | XIII        |
|                             | R-5'GGCCAGGAAGGACCCATCTT-3'   |                    |             |
| F-5CAAGCTTATGGACAGAGATG-3'  | 509                           | XIV                |             |
| R-5'GGCCAGGGCCTGCATCTCGT-3' |                               |                    |             |
